# Supplementary material for: “How to Speak to Your Psychiatrist”: Shared Decision-Making Training for Inpatients With Schizophrenia
Source: Atypon-hosted journal article supplement (doi:10.1176/ps.62.10.pss6210_1218), 2011-10-01

## **Additional References**

### Autonomy Preference Index, API

Ende J, Kazis L, Ash A, et al: Measuring patients' desire for autonomy: decision-making and information-seeking preferences among medical patients. *Journal of General Internal Medicine* 4(1): 23-30, 1989

### Decision self-efficacy scale

Bunn H & O'Connor A: Validation of client decision-making instruments in the context of psychiatry. *Canadian Journal of Nursing Research* 28(3): 13-27, 1996

### Beliefs in medication Questionnaire, BMQ

Horne R, Weinman J: Patients' beliefs about prescribed medicines and their role in adherence to treatment in chronic physical illness. *Journal of Psychosomatic Research* 47(6): 555-567, 1999

### Treatment satisfaction

Langewitz W, Keller A, Denz M, et al: [The Patient Satisfaction Questionnaire: a suitable tool for quality control in the physician-patient relationship?]. *Psychotherapie Psychosomatik Medizinische Psychologie* 45(9-10): 351-357, 1995

### Positive and negative syndrome scale, PANSS

Kay SR, Fiszbein A, Opler LA: The positive and negative syndrome scale (PANSS) for schizophrenia. *Schizophrenia Bulletin* 13(2): 261-276, 1987

### Therapeutic Alliance

Pajonk FG, Schmitz F, Karow A, et al: Assessment of Therapeutic Alliance in the Treatment of Schizophrenic Patients. Schizophrenia Research, 81: 96, 2006

### Trust in Physician Scale

Glattacker M, Gülich M, Farin E, et al: Vertrauen in den Arzt („VIA“) - Psychometrische Testung der deutschen Version der "Trust in Physician Scale". Physikalische Medizin, Rehabilitationsmedizin, Kurortmedizin 17: 141-148, 2007

### Multidimensional Health Locus of Control Scales

Wallston BS, Wallston KA, Kaplan GD, et al: Development and validation of the health locus of control (HLC) scale. Journal of Consulting & Clinical Psychology 44(4): 580-585, 1976

### Difficult Doctor-Patient-Relationship Questionnaire

Hahn SR, Thompson KS, Wills TA, et al: The difficult doctor-patient relationship: somatization, personality and psychopathology. Journal of Clinical Epidemiology 47(6): 647-657, 1994

## Content of the shared decision-making training

| Session | Content of the session                                                                                                                                                                                                                                                |
|---------|-----------------------------------------------------------------------------------------------------------------------------------------------------------------------------------------------------------------------------------------------------------------------|
| 1       | Patients' experiences with information provision and decision-making, models of decision-making in clinical encounters, patients' preferences for participation in treatment decisions, advantages of patient participation in treatment decisions, patients' rights. |
| 2       | Methods for preparing for a consultation, communication skills for the consultation, including role plays and home work (question asking).                                                                                                                            |
| 3       | Question asking in the consultation, including role plays and home work (expressing wishes and concerns).                                                                                                                                                             |
| 4       | Role plays including question asking, being assertive, speaking up; home work (expressing wishes and concerns, question asking, being assertive).                                                                                                                     |
| 5       | Recapitulation of sessions 1-4, working out take home messages to ensure that patients transfer more of the training's content into practice.                                                                                                                         |

# CONSORT diagram

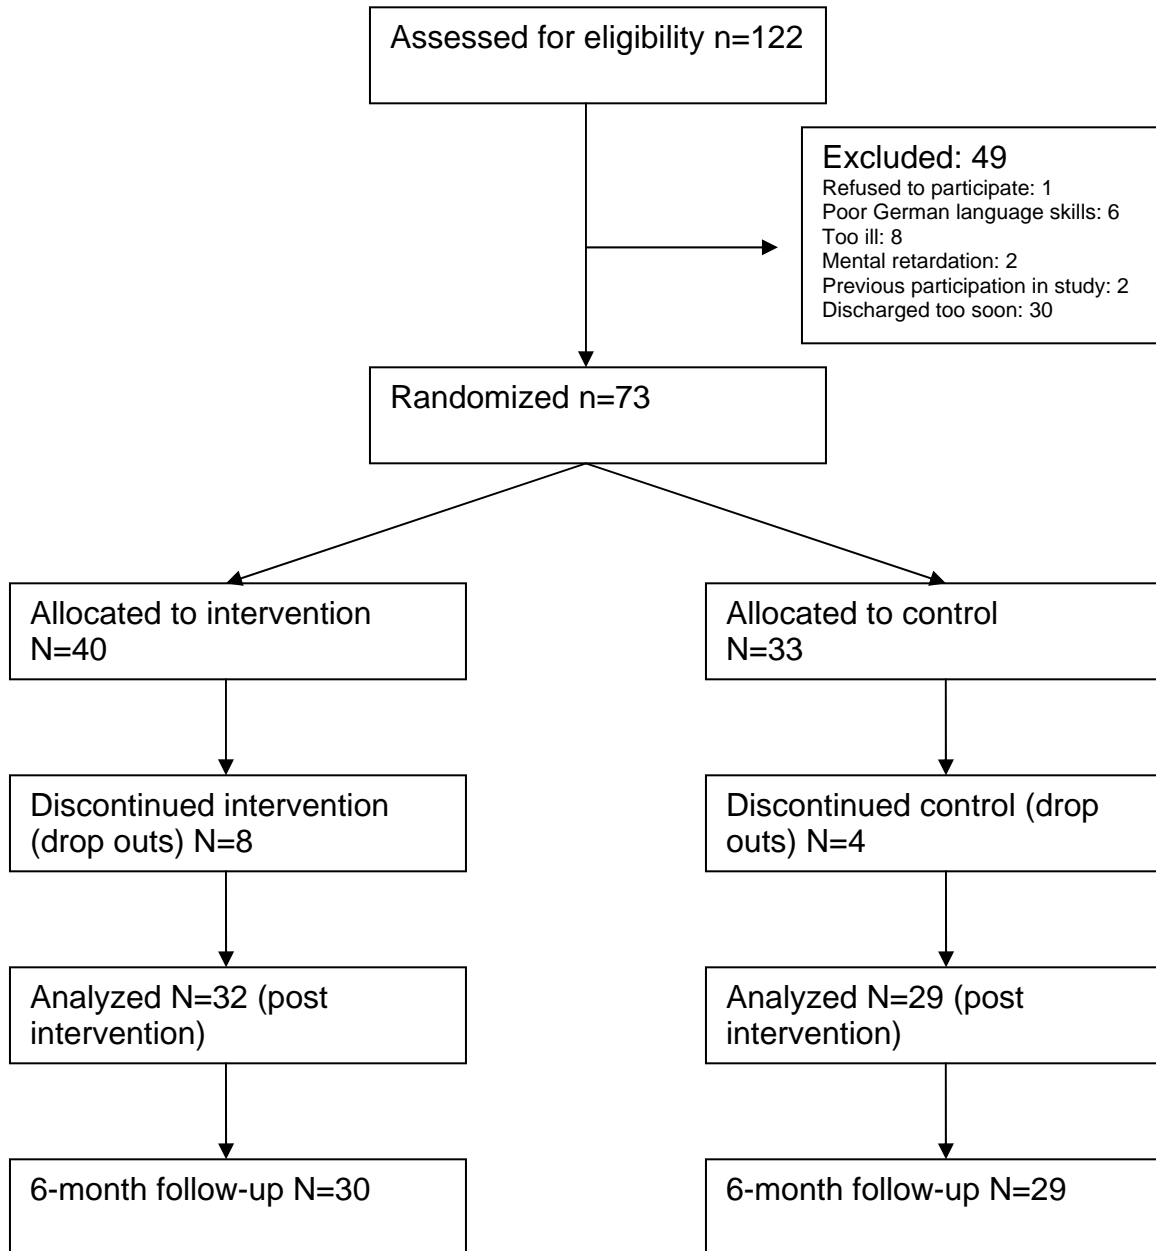

Supplement: Hamann_DS.pdf [file Hamann_DS.pdf]
